# Supplementary material for: Provision of primary care by specialist physicians: a systematic review
Source: PubMed Central journal article supplement — Fam Med Community Health. 2020 Feb 25;8(1):e000247. doi: 10.1136/fmch-2019-000247 (PMC7046372; doi:10.1136/fmch-2019-000247), 2020-02-25

## Supplementary Appendix

Table S1. Search strategy

| <i>Database</i>                | <i>Search string</i>                                                                | <i>Records retrieved</i> | <i>Comments</i>                      |
|--------------------------------|-------------------------------------------------------------------------------------|--------------------------|--------------------------------------|
| MEDLINE PubMed                 | specialist [ti] AND (routine OR primary) AND provi* [ti]                            | 55                       | Limits: Human, Abstract.             |
|                                | "Specialization"[Mesh] AND "Primary Health Care"[Mesh] NOT (student OR education)   | 553                      | Limits: Human, Abstract.             |
| ScienceDirect                  | specialist AND (routine OR primary) AND provi*                                      | 245                      | Limits: Research and Review articles |
| Scopus                         | specialist AND (routine OR primary) AND provi*                                      | 60                       |                                      |
| EBSCO Academic Search Complete | specialist AND (routine OR primary) AND provi* [title]                              | 26                       | Limits: none.                        |
| Web of Science                 | (TI=(specialist AND (routine OR primary) AND provi*)) AND DOCUMENT TYPES: (Article) | 38                       | Limits: none.                        |
| Embase                         | 'specialist':ti AND 'primary care':ti                                               | 156                      | Limits: Humans, English, Abstracts.  |
|                                | Total                                                                               | 1,133                    |                                      |

The 'Similar Articles' feature in PubMed was used to locate additional relevant articles.

Table S2. Included studies

| <i>Author</i>                                 | <i>Country</i> | <i>Year</i> | <i>Setting</i>                                         | <i>Study design</i>                                             | <i>Rate of primary care provision by specialists (percent)</i> |
|-----------------------------------------------|----------------|-------------|--------------------------------------------------------|-----------------------------------------------------------------|----------------------------------------------------------------|
| Spiegel, 1983 A                               | USA            | 1983        | Health systems data                                    | Retrospective data analysis                                     | 34                                                             |
| Spiegel, 1983 B                               | USA            | 1983        | Health systems data                                    | Retrospective data analysis                                     | 12                                                             |
| Spiegel, 1983 C                               | USA            | 1983        | Health systems data                                    | Retrospective data analysis                                     | 9                                                              |
| Rosenblatt, Hart, Baldwin, Chan, Schneeweiss  | USA            | 1998        | Washington State Medicare claims data                  | Retrospective analysis, 1994-1995 data, patients aged 65+ years | 14.7                                                           |
| Fink, Baldwin, Lawson, Chan, Rosenblatt, Hart | USA            | 2001        | Washington State Medical claims data for Gynecologists | Retrospective analysis, 1994-1995 data, patients aged 65+ years | 6.7                                                            |
| Mold                                          | USA            | 2004        | US Physicians                                          | Cross-sectional survey                                          | 40                                                             |
| Fryer                                         | USA            | 2004        | Statewide survey                                       | Questionnaire survey of specialists                             | 46.5                                                           |
| Stock Keister,                                | USA            | 2004        | Patients                                               | Population based survey                                         | 11                                                             |
| Woodwell, NAMCS                               | USA            | 2002        | Ambulatory clinics                                     | US nationwide survey of physicians in ambulatory clinics        | 50                                                             |
| NCHS, NAMCS                                   | USA            | 2013        | Ambulatory clinics                                     | NAMCS 2013                                                      | 5.3                                                            |
| Edwards, NAMCS                                | USA            | 1997        | Ambulatory clinics                                     | NAMCS 1997                                                      | 30.6                                                           |
| Edwards, NAMCS                                | USA            | 2010        | Ambulatory clinics                                     | NAMCS 2010                                                      | 9.8                                                            |
| Edwards, Mafi, Landon                         | USA            | 2014        | Office-based physicians                                | NAMCS 1997 – 2010, secondary data analysis                      | 30.6 (in 1997) to 9.8 (2010)                                   |

Table S3. Excluded studies

| <i>Ref</i>     | <i>Year</i> | <i>Study design</i>                                                                                                              | <i>Rate</i> |
|----------------|-------------|----------------------------------------------------------------------------------------------------------------------------------|-------------|
| Romaire, 2014  | 2014        | Health systems data (US Medicare beneficiaries claims data) – did not assess whether the specialists were providing primary care | 25          |
| Valderas, 2009 | NAMCS 2002  | Pediatric patients only. Data is subset of Woodwell, NAMCS 2002                                                                  | 41.3        |

Figure S1. PRISMA flowchart

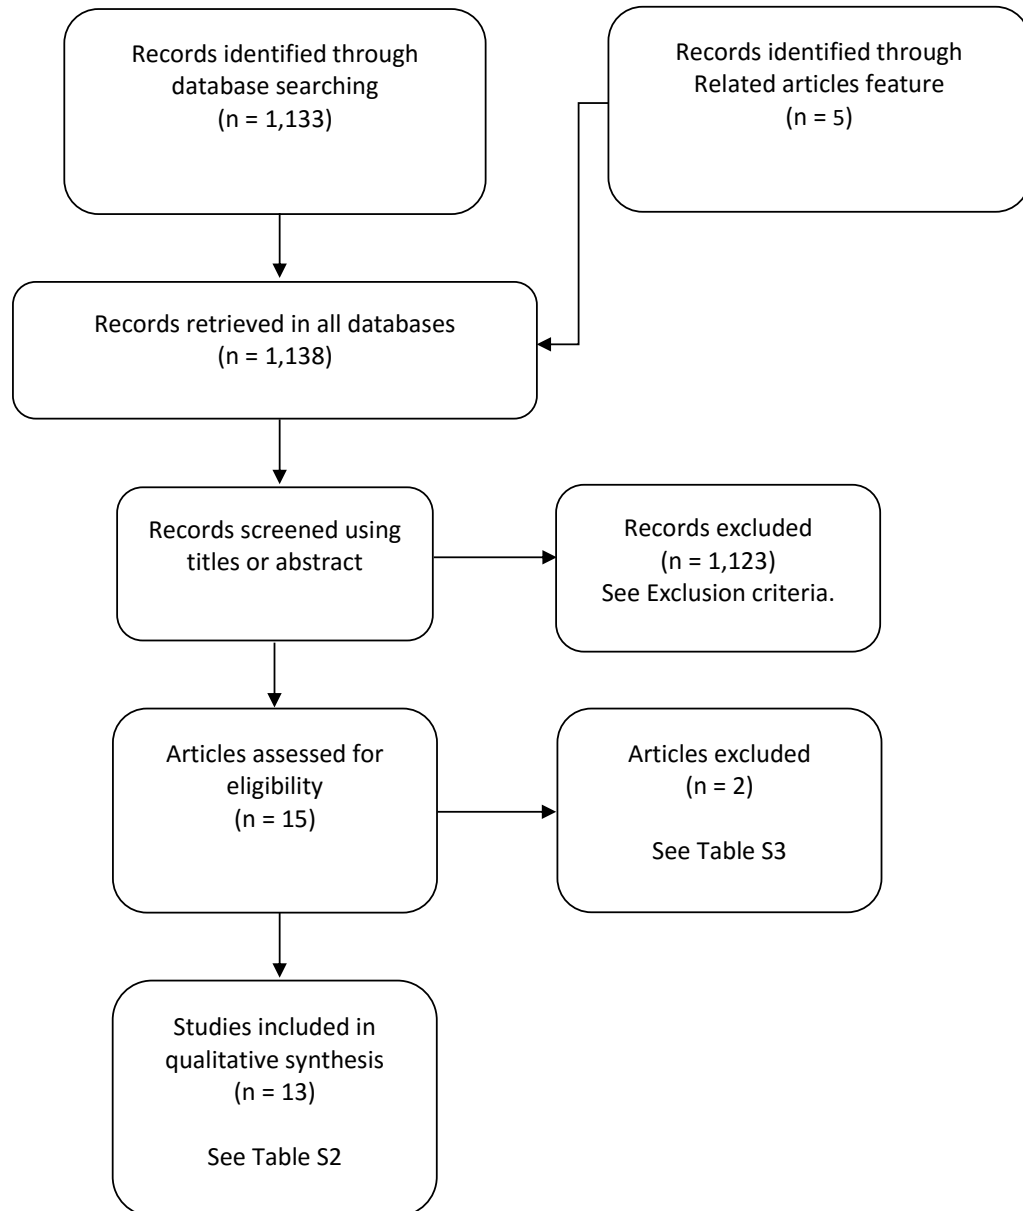

Supplement: fmch-2019-000247supp001.pdf [file fmch-2019-000247supp001.pdf]
